# Supplementary material for: Preparation and recyclable catalysis performance of functional macroporous polyHIPE immobilized with gold nanoparticles on its surface
Source: Royal Society of Chemistry journal article supplement (doi:10.1039/c8ra00089a), 2018-01-01
Supplement: c8ra00089a1.pdf [file c8ra00089a1.pdf]

Electronic Supplementary Information for:

**Preparation and recyclable catalysis performance of functional  
macroporous polyHIPE immobilized with gold nanoparticles on its  
surface**

Weizhong Yuana\*, Xiangnan Chen<sup>a</sup>, Yifan Xu<sup>a</sup>, Chuan Yan<sup>a</sup>, Yang Liu<sup>a\*</sup>, Weishuai Lian<sup>a\*</sup>, Yun  
Zhou<sup>a\*</sup> and Zhihong Li<sup>b\*</sup>

<sup>a</sup> *Tongji Hospital, School of Medicine, Department of Interventional and Vascular Surgery of  
Shanghai Tenth People's Hospital, School of Materials Science and Engineering, Tongji  
University, Shanghai 201804, P. R. China. E-mail: yuanwz@tongji.edu.cn (W. Yuan),  
25936615@qq.com (Y. Liu), lianweishuai@126.com (W. Lian), Zhouyunsy@126.com (Y. Zhou)*

<sup>b</sup> *Division of General Surgery, Shanghai Pudong New District Zhoupu Hospital, Shanghai 201200,  
P. R. China. E-mail: lance007@126.com (Z. Li)*

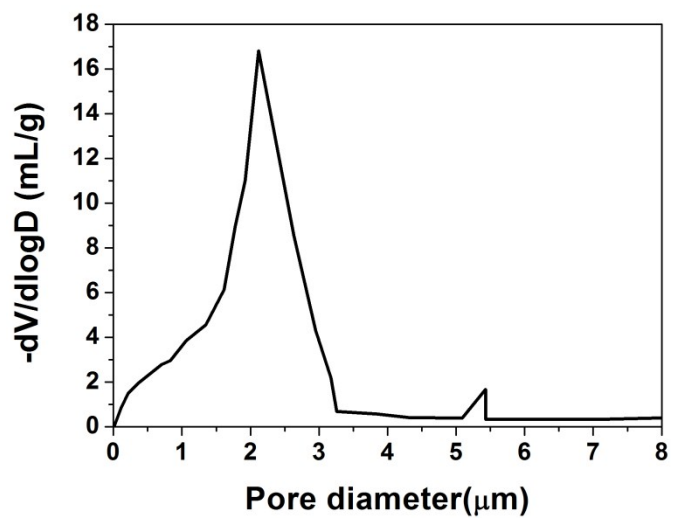

**Fig. S1** Pore size distribution of PHIPE-PGMA-TETA/Au by MIP.

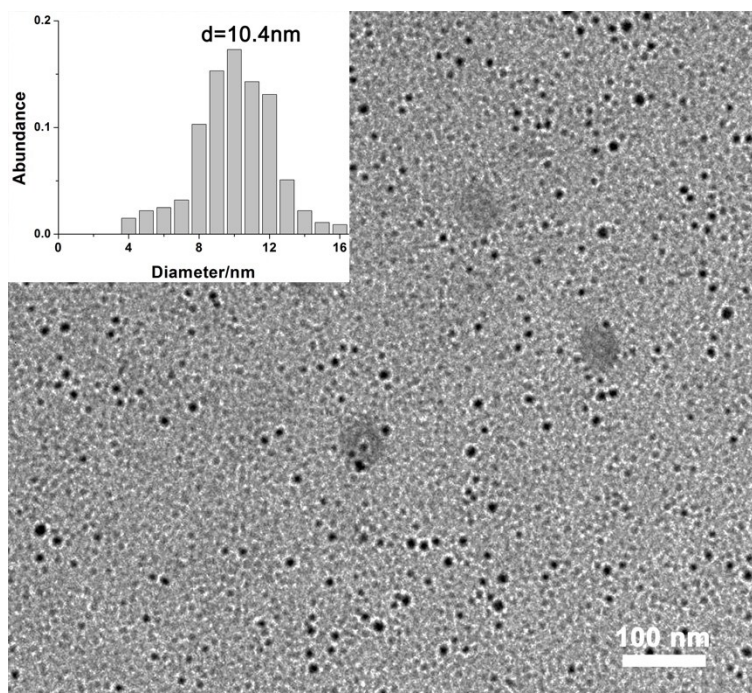

**Fig. S2** TEM micrograph of Au NPs.

Table S1. Densities and porosities of PolyHIPEs

|                                             | PHIPE-PGMA-TETA | PHIPE-PGMA-TETA/Au |
|---------------------------------------------|-----------------|--------------------|
| $\rho^a$ , g cm <sup>-3</sup>               | 0.2401          | 0.2882             |
| $\delta^b$ , m <sup>2</sup> g <sup>-1</sup> | 43.2431         | 41.4738            |
| $V_g^c$ , ml g <sup>-1</sup>                | 0.2496          | 0.2288             |
| $D^d$ , nm                                  | 25.63           | 26.24              |
| $d_v \pm \sigma^e$ , $\mu\text{m}$          | $2.3 \pm 1.1$   | $2.3 \pm 1.0$      |
| $P^f$ , %                                   | 86.7            | 86.4               |

<sup>a</sup> Dry polyHIPE density.

<sup>b</sup> Specific surface area from BET treatment of N<sub>2</sub> adsorption data.

<sup>c</sup> Pore volume from BET treatment of N<sub>2</sub> adsorption data.

<sup>d</sup> Average pore size within the walls of the monoliths and obtained from BJH treatment of N<sub>2</sub> adsorption data.

<sup>e</sup> Void diameter determined from SEM pictures of broken samples.

<sup>f</sup> Porosity of polyHIPE void structure from BET treatment of N<sub>2</sub> adsorption data.

Table S2. Comparison of the properties of nano-Au catalytic polymers based on the reduction of 4-Nitrophenol

| Support                | TOF(h <sup>-1</sup> ) | Recyclable performance | Separation of materials                 | Reference                               |
|------------------------|-----------------------|------------------------|-----------------------------------------|-----------------------------------------|
| P4VP-g-CNC             | 3124.8                | Not mentioned          | Centrifugation                          | Carbohydrate Polymers 182 (2018) 61–68  |
| Ionic cellulose        | 900                   | 97% (5 times)          | filtration with the addition of acetone | RSC Adv., 2018, 8, 1758–1763            |
| HPEI-IBAm              | 120                   | 95% (6 times)          | Centrifugation                          | J. Mater. Chem., 2010, 20, 360–368      |
| PEI/PVA nanofibers     | <1                    | 97% (3 times)          | filtration                              | J. Mater. Chem., 2011, 21, 4493         |
| magnetic porous carbon | 35.4                  | >97% (6 times)         | magnetic separation                     | J. Mater. Chem. A, 2014, 2, 18775–18785 |
| PHIPE-PGMA-TETA.       | 6.3                   | >96%(10 times)         | Tweezers out                            | This work                               |
